# Supplementary material
Source: PubMed Central journal article supplement (PMC3754562)
Supplement: JB.00546-13_zjb999092731so1.pdf [file JB.00546-13_zjb999092731so1.pdf]

1 **A multicopper oxidase is required for copper resistance in *Mycobacterium***  
2 ***tuberculosis***

3 Jennifer L. Rowland and Michael Niederweis<sup>#</sup>

4

5

6 Department of Microbiology, University of Alabama at Birmingham, 609 Bevill Biomedical Research

7 Building, 845 19th Street South, Birmingham, AL 35294, U.S.A.

8

9

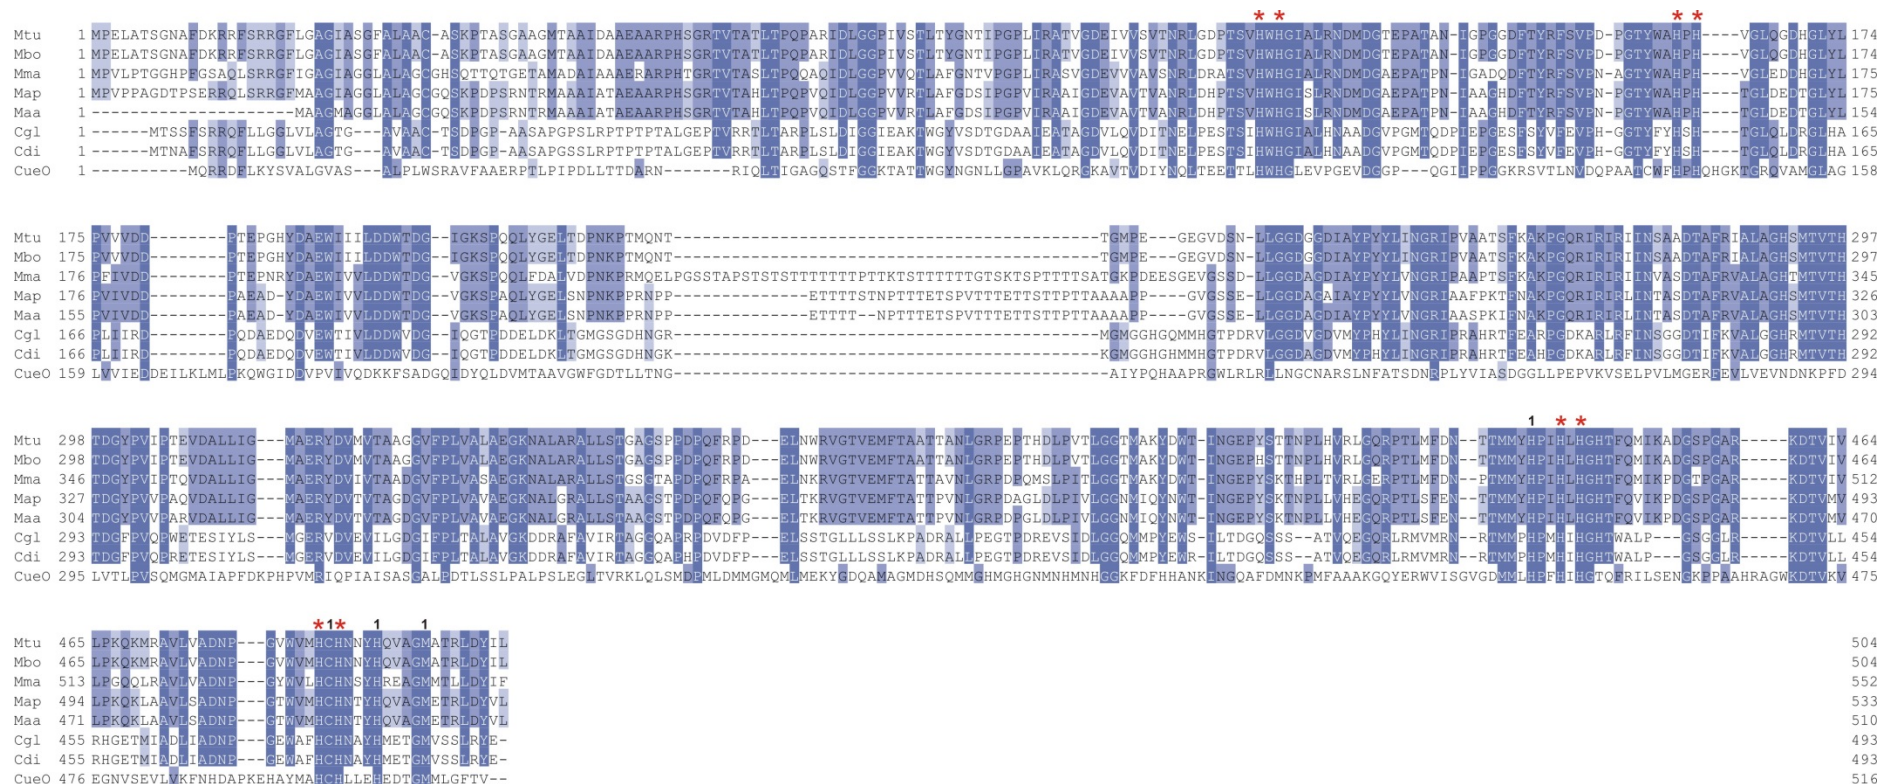

10 **Supplemental Figure 1. Alignment of putative MCOs in mycobacteria and other bacteria. Sequences of mycobacterial**  
11 **multicopper oxidases and others were obtained by Blast search of sequenced genomes in the NCBI database. Alignment**  
12 **was performed using ClustalW, and the alignment image was generated with JalView. Mtu: *M. tuberculosis*, MmcO; Mbo: *M.*  
13 ***bovis*, Mb0869c; Mma: *M. marinum*, MMAR\_4770 ; Map: *M. avium paratuberculosis* K10, MAP0701c ; Maa: *M. avium avium*,**  
14 **MaviaA2\_3747 ; Cgl: *Corynebacterium glutamicum*, CopO (cg3287 or NCgl2865); Cdi: *C. diphtheriae*, CDHC02\_0060; CueO: *E. coli***  
15 **CueO. Red stars indicate conserved active site residues (Type II or Type III copper coordinating residues). Bold number 1 indicates**  
16 **conserved Type I copper coordinating residues.****
